# Supplementary material for: The Effect of the Timing of Dexamethasone Administration in Patients with COVID-19 Pneumonia
Source: PubMed Central journal article supplement — Tuberc Respir Dis (Seoul). 2021 Mar 29;84(3):217–25. doi: 10.4046/trd.2021.0009 (PMC8273022; doi:10.4046/trd.2021.0009), 2021-03-29
Supplement: trd-2021-0009-suppl.pdf [file trd-2021-0009-suppl.pdf]

**Supplementary Table S1. Serial change of physiologic parameters from the time when hypoxemia occurred (day 0) to day 3**

|                               | D0                  | D1                  | D2                  | D3                   | p-value |
|-------------------------------|---------------------|---------------------|---------------------|----------------------|---------|
| Respiratory rate, per minute  | 20 (18–22)          | 20 (18–22)          | 20 (18–22)          | 20 (18–22)           | 0.645   |
| Heart rate, per minute        | 89 (76–98)          | 85 (78.5–95.5)      | 82 (71.5–90)        | 76 (67–87)           | <0.001  |
| SpO <sub>2</sub> , %          | 88 (87–90)          | 95 (93–96)          | 94 (92–96)          | 95 (93–96)           | 0.011   |
| O <sub>2</sub> , L/min        | 2 (2–3)             | 3 (2–4)             | 3 (2–6)             | 3 (1–4)              | 0.011   |
| WBC, 10 <sup>3</sup> /μL      | 5,440 (3,910–7,516) | 5,920 (4,325–7,735) | 6,440 (5,385–8,928) | 7,460 (5,350–10,070) | 0.004   |
| Hemoglobin, g/dL              | 12.9 (12.0–14.2)    | 13.0 (11.9–14.0)    | 13.1 (11.5–13.9)    | 12.8 (11.8–14.1)     | 0.958   |
| Platelet, 10 <sup>3</sup> /μL | 171 (137–221)       | 195 (143–251)       | 217 (176–274)       | 243 (172–307)        | <0.001  |

Values are presented as median (interquartile range).

p-value was calculated by repeated measure analysis of variance.

SpO<sub>2</sub>: oxygen saturation; WBC: white blood cell.
